# Supplementary material for: Is there an association between subjective sleep quality and daily delirium occurrence in critically ill adults? A post hoc analysis of a randomised controlled trial
Source: PubMed Central journal article supplement — BMJ Open Respir Res. 2020 Aug 26;7(1):e000576. doi: 10.1136/bmjresp-2020-000576 (PMC7451265; doi:10.1136/bmjresp-2020-000576), 2020-08-26
Supplement: bmjresp-2020-000576supp001.pdf [file bmjresp-2020-000576supp001.pdf]

## Leeds Sleep Evaluation Questionnaire

### How would you describe the way you currently fall asleep in comparison to usual?

1. More difficult than usual \_\_\_\_\_ Easier than usual
2. Slower than usual \_\_\_\_\_ More quickly than usual
3. I feel less sleepy than usual \_\_\_\_\_ More sleepy than usual

GTS - getting to sleep

### How would you describe the quality of your sleep compared to normal sleep?

4. More restless than usual \_\_\_\_\_ Calmer than usual
5. With more wakeful periods than usual \_\_\_\_\_ With less wakeful periods than usual

QOS - quality of sleep

### How would you describe your awakening in comparison to usual?

6. More difficult than usual \_\_\_\_\_ Easier than usual
7. Requires a longer period of time than usual \_\_\_\_\_ Shorter than usual

AFS – Awake following sleep

### How do you feel when you wake up?

8. Tired \_\_\_\_\_ Alert

### How do you feel now?

9. Tired \_\_\_\_\_ Alert

BFW – behaviour following waking

### How would you describe your balance and co-ordination upon awakening?

10. More disrupted than usual \_\_\_\_\_ Less disrupted than usual
